# Supplementary material
Source: PubMed Central journal article supplement (PMC7605790)
Supplement: mmc1.pdf [file mmc1.pdf]

# WEBAPPENDIX

PART 1: Material and methods

PART 2: The study protocol

PART 3: Results

# PART 1: Material and methods

## Methods

A protocol was assembled to gather demographic data and also data pertaining to general health, previous psychiatric history, current symptoms of anxiety (STAI-Y1 state)<sup>1</sup>, depression (CES-D)<sup>2</sup> and suicidality (RASS),<sup>3</sup> as well as a detailed protocol to investigate changes because of the lockdown in sleep, sex, family relationships, finance, eating and exercising and religion/spirituality. Additionally, the beliefs concerning the COVID-19 outbreak, including the measures taken and conspiracy theories, were investigated.

The full protocol is shown in the part 2 of the webappendix.

Each question of the protocol was given an ID code, reflecting the part of the protocol it belongs to with a capital letter and a number to denote its position within that protocol part. Throughout the results these ID codes are used for increased accuracy.

According to a previously developed method,<sup>2,3</sup> the cut-off score 23/24 for the CES-D score and a previously derived algorithm were used to identify cases of probable clinical major depression. Cases of clinical depression were considered those positively identified by both methods. Those identified by only one of them, were considered to be cases of distress (false positive cases in terms of depression).

The data were collected online and anonymously from April 11<sup>th</sup> to May 1<sup>st</sup>, 2020, during the period of the full implementation of lockdown in the country.

Approval was given by the Ethics Committee of the Faculty of Medicine, Aristotle University of Thessaloniki, Greece.

## Materials and Populations

The study sample included

- 2756 females (81.08%; aged 34.02±9.72) and
- 621 males (18.27%; aged 36.38±10.33)
- 22 declared 'other' (0.64%; aged 29.59±6.68)

In terms of residence,

- 1367 (40.21%) were living in the capital city of Athens or the county of Attica,
- 675 (19.85%) in the city of Thessaloniki or its county,
- 341 (10.03%) in a city of >100,000 population,
- 452 (13.29%) in a city of 20-100,000 population,
- 221 (6.50%) in a town of <20,000 population and
- 343 (10.09%) in a rural area or village.

In terms of family status,

- 1510 (44.18%) were either married or living with someone,
- 1054 (30.83%) had at least one kid,
- 526 (15.38%) were living alone,

- 693 (18,69%) had finished high school while the rest had at least a college or university degree.

In terms of work status,

- 1380 (40.37%) were private clerks,
- 531 (15.53%) self-employed,
- 356 (10.41%) unemployed),
- 501 (14.66%) civil servants,
- 390 (11.41%) students,
- 16 (0.46%) with disability pension or benefit while
- the rest checked ‘other’.

## **Statistical Analysis**

### ***Stratification of the sample:***

The study population was self-selected and not representative of the general population. The most important problems were that females were grossly over-represented, and the study sample was much younger since the average age of the general population aged 18-69 is 44.84 years for females and 44.17 years for males (calculation by the authors on the basis of National Statistics Authority data). On the other hand, the place of residency was more or less representative of the population distribution of the general population in Greece.

A method of simplified post-stratification was used <sup>4-8</sup> in order to create a standardized study sample with characteristics as close as possible to those of the Greek general population. The key variables used for the transformation were sex, age, family status (married) and work (unemployed, civil servants, self-employed and private clerks). The source for data concerning the general population was the National Statistics Authority ([www.statistics.gr](http://www.statistics.gr)). The transformation utilized the multiplication of blocks of data corresponding to the above key variables, in discrete steps. The first step concerned to. the quadruplicate of all male data; the second to triple all data of persons without a history of self-harm; the third step was to delete two-thirds of university/college students in a random way (random number generator from excel spreadsheet). The fourth and final step was to quadruplicate the persons with age>45. This led to the creation of a dataset with 20,693 ‘dummy cases’ which was closer to the general population and could be considered to be representative (table 1). The utilization of groups of cases en block during the creation of this dataset is expected to keep the correlation between variables intact.

### ***Analysis of the stratified study sample***

After the stratified study sample was created, descriptive tables were created for the variables under investigation, in order to calculate rates expected to reflect the prevalence of specific characteristics in the general population of Greece during the lockdown.

### ***Case-control analysis***

- Chi-square tests were used for the comparison of frequencies when categorical variables were present and for the post-hoc analysis of the results a Bonferroni-corrected method of pair-wise comparisons was utilized <sup>9</sup>.
- Multiple forward stepwise linear regression analysis was performed with Scheffé as post hoc test to investigate which variables could contribute to the development of others.
- Factorial Analysis of Variance (ANOVA) was used to test for the main effect as well as the interaction among categorical variables.

## **PART 2: The study protocol**

### **A. GENERAL DATA**

#### **A1. Sex**

- Male
- Female
- Other/I do not wish to define

#### **A2. Date of Birth written with 4 digits (e.g. 1982)B**

Please enter your date of birth in the form of 4 digits (e.g. 1981, 1968, 1993 etc.)

#### **A3. Place of residence during this period**

- Capital City
- City > 1 million population
- City (100.000 – 1 million population)
- Town (20.000 – 100.000 inhabitants)
- Town (<20.000 inhabitants)
- Rural area - Village

#### **A4. Marital Status**

- Single
- Married (or in a civil partnership)
- Divorced (or estranged)
- Live with someone without an official relationship
- Widower
- Other

#### **A5. How many people reside in the house you are staying in during this period (including yourself)?**

- 1 (I live alone)
- 2 people
- 3 people
- 4 people

- 5 or more people

**A6. How many children do you have (regardless of whether they live in the same house with you or not)?**

- 0 (I do not have any children)
- 1 child
- 2 children
- 3 children
- 4 or more children

**A7. Education**

- Elementary school or less (no more than 9 years of education)
- High school degree or equivalent (no more than 12 years of education)
- Bachelor's degree
- Master's degree
- Doctorate (PhD)

**A9. Employment**

- Working at the Public Sector
- Salaried employee at the Private Sector
- Self-employed/Freelancer
- Retired
- Unemployed
- Housekeeping
- Retirement for health reasons
- Allowance for health reasons
- Not working by choice (e.g. living via corporate earnings etc.)
- University or College Student
- Other

**A10. Employment in the Health Sector**

- I do not work in the Health Sector
- Doctor
- Nurse
- Other healthcare profession with direct contacts with areas of clinical work
- Administrative employee at a hospital
- Other hospital staff

**A11. Do you continue to exercise your profession during the period of the lockdown?**

- Yes
- No

**B. GENERAL STATE OF HEALTH AND COVID-19**

**B1. In general, your health over the last month can be described as:**

- Excellent
- Very good
- Good
- Moderate
- Bad

**B2. Do you suffer from any chronic medical condition (for example: diabetes mellitus, hypertension, asthma, etc.)?**

- Yes
- No

**B3. If yes, please define your chronic medical condition:**

**B4. Are you a close relative or caretaker of a person that belongs to a vulnerable group?**

- Yes
- No

**B5. In the past, have you had any mental health problem serious enough to make you seek professional health, psychotherapy or medication treatment?**

- No
- Anxiety
- Depression
- Psychosis
- Bipolar Disorder
- Other

**B6. Are you currently under any kind of treatment for your mental state? (please check all of those that are true)**

- No
- Psychotherapy
- Antipsychotics
- Antidepressants
- Tranquilizers/benzodiazepines (lexotanil, xanax, tavor, etc.)

### **C. THOUGHTS ABOUT COVID-19**

**C1. Are you afraid that you will contract the coronavirus;**

- Never
- A little
- Moderately
- Much
- Very Much

**C2. Do you believe that the precautions work effectively or that if you are about to contract the disease, you will contract it anyway?**

- Precautions work effectively.
- Precautions cannot protect you.

**C3. Does the possibility that a member of your family could contract the coronavirus and die because of it makes you frightened?**

- Never
- A little
- Moderately
- Much
- Very Much

**C4. Are you afraid that in case you contract the coronavirus, some people will step away from your life and behave to you in a different way later?**

- Never
- A little
- Moderately
- Much
- Very Much

**D. THOUGHTS ABOUT THE MEASURES TAKEN (PRECAUTIONS, LOCKDOWN, ETC.)**

**D1. According to your opinion, the amount of time that you spend outside of your house for reasons not regarding your work during this period is:**

- Minimum
- Less than humanly necessary
- Moderate/reasonable
- Enough
- A lot
- Excessive

**D2. Are you currently locked up in the house?**

- Completely
- To a high degree
- Partially
- Not at all

**D3. According to the instructions given by WHO, it is necessary for some precautions to be taken in order to prevent the spread of the virus. Do you believe that you take adequate precautions?**

- Not at all
- A little bit
- Moderately
- Much
- Very Much

**D4. Do you believe that that you have received sufficient information about the necessity of the measures taken?**

- Not at all
- A little bit
- Moderately
- Much
- Very Much

## **E. FAMILY**

**E1. Do you feel the need to communicate with other members of your family during this period?**

- Much less
- Less
- Same
- More
- Much more

**E2. Do you want to receive emotional support from other members of your family during this period?**

- Much less
- Less
- Same
- More
- Much more

**E3. Are there any conflicts with the rest of your family members during this period?**

- Much less
- Less
- Same
- More
- Much more

**E4. Has the overall quality of relationships with the other members of your family changed compared to the one before the quarantine, due to COVID – 19?**

- Much worse
- Worse
- It has not changed
- A little bit better
- Much better

**E5. Do you manage to maintain a basic daily routine (waking up in the morning, regular meals and sleeping hours, activities) both yourself (if you live alone) or as a family?**



- Not at all
- Somehow, but not always
- Generally, yes
- Clearly follow (or adhere to) a routine

**E6. If you have children, how difficult is it to manage their daily life and behavior?**

- Much more difficult than before
- Somehow more difficult but not always
- Same as always
- Somehow easier but not always
- Much easier than before

**E7. How are your finances as a result of the outbreak?**

- Much more difficult than before
- Somehow more difficult
- Same as always
- Somehow easier
- Much easier than before

**F. ANXIETY**

**State-Trait Anxiety inventory**

**State questions F1-F20**

**F21. How much has your emotional state changed in relation to the appearance of anxiety and insecurity compared to before the COVID-19 epidemic?**

- It got a lot worse
- It got a little worse
- Neither better nor worse
- It's a little improved
- It has improved a lot

**G. SADNESS & DEPRESSION/MELANCHOLY**

**G1. I was bothered by things that usually don't bother me.**

- Rarely or none of the time (less than 1 day)
- Some of a little of the time (1-2 days)
- Occasionally or a moderate amount of time (3-4 days)
- Most or all of the time (5-7 days)

**G2. I did not feel like eating; my appetite was poor.**

- Rarely or none of the time (less than 1 day)
- Some of a little of the time (1-2 days)
- Occasionally or a moderate amount of time (3-4 days)

- Most or all of the time (5-7 days)

**G3. I felt that I could not shake off the blues even with help from my family or friends.**

- Rarely or none of the time (less than 1 day)
- Some of a little of the time (1-2 days)
- Occasionally or a moderate amount of time (3-4 days)
- Most or all of the time (5-7 days)

**G4. I felt I was just as good as other people.**

- Rarely or none of the time (less than 1 day)
- Some of a little of the time (1-2 days)
- Occasionally or a moderate amount of time (3-4 days)
- Most or all of the time (5-7 days)

**G5. I had trouble keeping my mind on what I was doing.**

- Rarely or none of the time (less than 1 day)
- Some of a little of the time (1-2 days)
- Occasionally or a moderate amount of time (3-4 days)
- Most or all of the time (5-7 days)

**G6. I felt depressed.**

- Rarely or none of the time (less than 1 day)
- Some of a little of the time (1-2 days)
- Occasionally or a moderate amount of time (3-4 days)
- Most or all of the time (5-7 days)

**G7. I felt that everything I did was an effort.**

- Rarely or none of the time (less than 1 day)
- Some of a little of the time (1-2 days)
- Occasionally or a moderate amount of time (3-4 days)
- Most or all of the time (5-7 days)

**G8. I felt full of hope about the future.**

- Rarely or none of the time (less than 1 day)
- Some of a little of the time (1-2 days)
- Occasionally or a moderate amount of time (3-4 days)
- Most or all of the time (5-7 days)

**G9. I thought my life had been a failure.**

- Rarely or none of the time (less than 1 day)
- Some of a little of the time (1-2 days)
- Occasionally or a moderate amount of time (3-4 days)
- Most or all of the time (5-7 days)

**G10. I felt fearful.**

- Rarely or none of the time (less than 1 day)
- Some of a little of the time (1-2 days)
- Occasionally or a moderate amount of time (3-4 days)
- Most or all of the time (5-7 days)

**G11. My sleep was restless.**

- Rarely or none of the time (less than 1 day)
- Some of a little of the time (1-2 days)
- Occasionally or a moderate amount of time (3-4 days)
- Most or all of the time (5-7 days)

**G12. I was happy.**

- Rarely or none of the time (less than 1 day)
- Some of a little of the time (1-2 days)
- Occasionally or a moderate amount of time (3-4 days)
- Most or all of the time (5-7 days)

**G13. I talked less than usual.**

- Rarely or none of the time (less than 1 day)
- Some of a little of the time (1-2 days)
- Occasionally or a moderate amount of time (3-4 days)
- Most or all of the time (5-7 days)

**G14. I felt lonely.**

- Rarely or none of the time (less than 1 day)
- Some of a little of the time (1-2 days)
- Occasionally or a moderate amount of time (3-4 days)
- Most or all of the time (5-7 days)

**G15. People were unfriendly.**

- Rarely or none of the time (less than 1 day)
- Some of a little of the time (1-2 days)
- Occasionally or a moderate amount of time (3-4 days)
- Most or all of the time (5-7 days)

**G16. I enjoyed life.**

- Rarely or none of the time (less than 1 day)
- Some of a little of the time (1-2 days)
- Occasionally or a moderate amount of time (3-4 days)
- Most or all of the time (5-7 days)

**G17. I had crying spells.**

- Rarely or none of the time (less than 1 day)
- Some of a little of the time (1-2 days)
- Occasionally or a moderate amount of time (3-4 days)

- Most or all of the time (5-7 days)

**G18. I felt sad.**

- Rarely or none of the time (less than 1 day)
- Some of a little of the time (1-2 days)
- Occasionally or a moderate amount of time (3-4 days)
- Most or all of the time (5-7 days)

**G19. I felt that people disliked me.**

- Rarely or none of the time (less than 1 day)
- Some of a little of the time (1-2 days)
- Occasionally or a moderate amount of time (3-4 days)
- Most or all of the time (5-7 days)

**G20. I could not get “going”.**

- Rarely or none of the time (less than 1 day)
- Some of a little of the time (1-2 days)
- Occasionally or a moderate amount of time (3-4 days)
- Most or all of the time (5-7 days)

**G21. How much has your emotional state related to the experience of joy or melancholy changed in comparison to before the COVID-19 epidemic?**

- It got a lot worse
- It got a little worse
- Neither better nor worse
- Improved a bit
- It has improved a lot

**H. PHYSICAL ACTIVITY**

**H1. Does exercise help you at the prevention of anxiety?**

- Not at all
- A little bit
- Moderately
- Much
- Very much

**H2. Do you consider that exercise is important during this pandemic?**

- Not at all
- A little bit
- Moderately
- Much
- Very much

**H3. Do you have increased the frequency and intensity of your physical workout during this pandemic and lockdown?**

- Not at all
- A little bit
- Moderately
- Much
- Very much

**H4. How much has your physical activity been affected by this epidemic of COVID-19?**

- It decreased much
- It decreased a little
- Neither decreased, nor increased
- It increased a little
- It increased much

**I. NUTRITION**

**I1. During the days of the lockdown did you notice the need to eat larger amounts of food or eat more often?**

- I eat much less than I used to
- I eat bit less than I used to
- Neither more nor less
- I eat a bit more than I used to
- I eat much more than I used to

**I2. Please mark the answer that best represents you during the period of the lockdown:**

- I eat in a healthier way.
- My eating habits and preferences have not changed.
- I eat in a more unhealthy way.

**I3. Please mark the answer that best represents you during the period of the lockdown:**

- My body weight has significantly decreased (more than 2-3 kilos).
- My body weight has slightly decreased (less than 2 kilos lost).
- My body weight is stable.
- My body weight has slightly increased (less than 2 kilos put).
- My body weight has significantly increased (more than 2-3 kilos).

**J. OPINIONS ABOUT THE ORIGIN OF THE EPIDEMIC**

**J1. Do you believe that the COVID-19 vaccine was ready even before the virus broke out and they conceal it from us for the benefit of pharmaceutical companies?**

- I don't believe it at all
- A little bit
- Maybe

- Much
- Very much

**J2. Do you believe that COVID-19 was created in a laboratory to be used as a biochemical weapon for the extermination of the human population?**

- I don't believe it at all
- A little bit
- Maybe
- Much
- Very much

**J3. Do you believe that COVID-19 is the result of 5G technology antenna?**

- I don't believe it at all
- A little bit
- Maybe
- Much
- Very much

**J4. Do you believe that COVID-19 appeared accidentally from human contact with animals and it was something that generally happens and was generally expected?**

- I don't believe it at all
- A little bit
- Maybe
- Much
- Very much

**J5. Do you believe that covid-19 has much lower mortality rate but there is misinformation and terror-inducing propaganda?**

- I don't believe it at all
- A little bit
- Maybe
- Much
- Very much

**J6. Do you believe that COVID-19 is a creation of the world's powerful leaders to create a global economic crisis?**

- I don't believe it at all
- A little bit
- Maybe
- Much
- Very much

**J7. Do you believe that CONID-19 is a sign of divine power to destroy our planet?**

- I don't believe it at all
- A little bit

- Maybe
- Much
- Very much

## **K. INTERNET**

### **K1. The information and use of the internet worry me about the issue regarding the COVID-19:**

- Not at all
- A little
- Moderately
- Much
- Very much

### **K2. Generally, most of the internet sources regarding information about COVID-19 are misinforming/misleading:**

- Not at all
- A little
- Moderately
- Much
- Very much

### **K3. Due to the conditions, the internet takes up more of my time than usual:**

- Not at all
- A little more
- Moderately more
- Much more
- Too much

### **K4. How much do you use the social media while in isolation at home?**

- More than before
- The same as before
- Less than before

### **K5. Have you acquired internet-related habits that you did not have before (for example: created a facebook account, engaging in cybersex or gambling)?**

- Yes
- No

## **L. SLEEP DURING THIS PERIOD**

### **L1. The quality of my sleep has changed recently. It is:**

- Much worse
- A little bit worse

- The same (neither worse nor better)
- A little better
- Much better

**L2. I tend to stay up late and sleep for many hours during the day.**

- Almost never
- Rarely
- Sometimes
- Often
- Almost always

**L3. I take sleeping pills to help me sleep at night.**

- Almost never
- Rarely
- Some times
- Often
- Almost always

**L4. I am having dreams in which I feel trapped, over the last 3 weeks.**

- Almost never
- Rarely
- Sometimes
- Often
- Almost always

**M. SMOKING, ALCOHOL AND SUBSTANCES USE**

**M1. Smoking before the epidemic:**

- I didn't smoke
- I was smoking

**M2. Alcohol use before the epidemic:**

- I did not drink much
- I drank a lot (more than one drink or its equivalent every day)

**M3. Use of illegal substances before the epidemic (e.g. hashish):**

- I did not use it
- Occasionally and rather rarely
- Often

**M4. During lockdown, you smoke compared to before:**

- More than before
- Same as before
- Less than before



**M5. During lockdown, you drink alcohol compared to before:**

- More than before
- Same as before
- Less than before

**M6. While isolated at home, you use illegal substances compared to before:**

- More than before
- Same as before
- Less than before

**N. SEXUALITY**

**N1. How would you characterize the frequency of your sexual intercourse?**

- Clearly inadequate
- Rather inadequate
- Neutral
- Rather satisfactory
- Clearly satisfactory

**N2. Due to the new lockdown conditions, has your desire for sexual intercourse increased or decreased?**

- Has decreased a lot
- Has decreased slightly
- Remains the same
- Has increased slightly
- Has increased a lot

**N3. How much pleasure and satisfaction do you get from your current sex life?**

- Not at all
- A little bit
- Moderate
- Much
- Very much

**N4. Do you think sex helps you deal with your daily stress and anxiety?**

- Not at all
- A little bit
- Moderate
- Much
- Very much

**O. THOUGHTS ABOUT DEATH**

**O1. Are you afraid that you are going to die?**

- Not at all
- A little bit
- Much
- Very much

**O2. Do you ever think that it would be better if you were dead?**

- Not at all
- A little bit
- Much
- Very much

**O3. Do you think that it is a wonderful thing that you are alive?**

- Not at all
- A little bit
- Much
- Very much

**O4. Have you ever felt that it's worth living?**

- Not at all
- A little bit
- Much
- Very much

**O5. Do you think of harming yourself physically?**

- Not at all
- A little bit
- Much
- Very much

**O6. Do you often think of committing suicide if you have the chance?**

- Not at all
- A little bit
- Much
- Very much

**O7. Do you make plans concerning the method to use in order to end your life?**

- Not at all
- A little bit
- Much
- Very much

**O8. I am thinking of committing suicide, but I won't do it.**

- Not at all
- A little bit

- Much
- Very much

**O9. Do you enjoy your life?**

- Not at all
- A little bit
- Much
- Very much

**O10. Are you feeling tired from your life?**

- Not at all
- A little bit
- Much
- Very much

**O11. How much has your tendency to think about death and/or suicide changed, compared to before the outbreak of COVID-19?**

- Very much increased
- Increased a bit
- Neither increased, nor decreased
- Decreased a bit
- Very much decreased

**O12. Have you ever hurt yourself in any way deliberately, during your whole life so far?**

- Never
- Once
- 2-3 times
- Many times

**O13. Have you ever attempted suicide, during your whole life so far?**

- Never
- Once
- 2-3 times
- Many times

**P. SPIRITUALITY AND PSYCHOLOGICAL REFLECTIONS**

**P1. Over the last 2-3 weeks, my religious/spiritual inquiries have been increased.**

- Not at all.
- A little bit
- Much
- Very Much

# PART 3: Results

## *a. Epidemiological analysis*

The epidemiological analysis aimed to calculate the prevalence of various characteristics and variables in the general population. Therefore, this analysis utilized the stratified dataset. The characteristics of the stratified dataset are shown in table 1 in the manuscript

### *History of mental health*

- History of any mental disorder: 29.60%
- History of depression: 26.92%
- Psychotic disorders: 0.49%
- Bipolar disorder: 0.12%
- Eating disorders: 0.11%
- Substance abuse disorder: 0.02%

### *Present status during lockdown*

- Increased anxiety > 45%
- More depressive feelings by almost 40%
- Suicidal thoughts were increased in 10.4% and decreased in 4.42%
- Major depression in 9.31%
- Distress in an additional 8.5%

### *Family status and relationships during the lockdown (WebTable 1)*

- One third of the sample concerned married cases
- The majority (58.01%) were carers of at least one person belonging to a vulnerable population
- There was an increased need for communication (>40%)
- Increased need for emotional support (24.16%) and
- Improvement of the quality of relationships (24.6%)
- Overall, conflicts within the family remained unchanged in comparison to before the lockdown
- Conflicts increased in families with children whose behavior was more difficult to manage than before (27.43%).
- In the majority of cases there was a maintenance of basic daily routine (58.13%).

### *Work and finances during the lockdown (WebTable 1)*

- During lockdown, 55.67% continued to work

- 47.37% expect their economic situation to worsen as a result of the COVID-19 outbreak

| Question                                                                                                                                                                       | Answer                                  | %     |
|--------------------------------------------------------------------------------------------------------------------------------------------------------------------------------|-----------------------------------------|-------|
| B4. Are you a close relative or caretaker of a person that belongs to a vulnerable group?                                                                                      |                                         | 58.01 |
| E1. Do you feel the need to communicate with other members of your family during this period?                                                                                  | Much less                               | 0.99  |
|                                                                                                                                                                                | Less                                    | 3.04  |
|                                                                                                                                                                                | same                                    | 53.95 |
|                                                                                                                                                                                | more                                    | 33.20 |
|                                                                                                                                                                                | much more                               | 8.82  |
| E2. Do you want to receive emotional support from other members of your family during this period?                                                                             | Much less                               | 2.97  |
|                                                                                                                                                                                | Less                                    | 3.04  |
|                                                                                                                                                                                | same                                    | 69.82 |
|                                                                                                                                                                                | more                                    | 19.63 |
|                                                                                                                                                                                | much more                               | 4.53  |
| E3. Are there any conflicts with the rest of your family members during this period?                                                                                           | Much less                               | 10.01 |
|                                                                                                                                                                                | Less                                    | 12.70 |
|                                                                                                                                                                                | no change                               | 62.99 |
|                                                                                                                                                                                | more                                    | 12.34 |
|                                                                                                                                                                                | much more                               | 1.95  |
| E4. Has the overall quality of relationships with the other members of your family changed compared to the one before the quarantine, due to COVID – 19?                       | Much worse                              | 0.27  |
|                                                                                                                                                                                | Worse                                   | 6.66  |
|                                                                                                                                                                                | It has not changed                      | 68.46 |
|                                                                                                                                                                                | A little bit better                     | 14.76 |
|                                                                                                                                                                                | Much better                             | 9.84  |
| E5. Do you manage to maintain a basic daily routine (waking up in the morning, regular meals and sleeping hours, activities) both yourself (if you live alone) or as a family? | Not at all                              | 12.53 |
|                                                                                                                                                                                | Somehow, but not always                 | 29.32 |
|                                                                                                                                                                                | Generally, yes                          | 44.11 |
|                                                                                                                                                                                | Clearly follow (or adhere to) a routine | 14.02 |
| E6. If you have children, how difficult is it to manage their daily life and behavior?                                                                                         | Much more difficult than before         | 7.13  |
|                                                                                                                                                                                | Somehow more difficult but not always   | 20.40 |
|                                                                                                                                                                                | Same as always                          | 38.49 |
|                                                                                                                                                                                | Somehow easier but not always           | 3.96  |
|                                                                                                                                                                                | Much easier than before                 | 4.22  |
| E7. How are your finances as a result of the outbreak?                                                                                                                         | Much more difficult than before         | 18.76 |
|                                                                                                                                                                                | Somehow more difficult                  | 28.61 |
|                                                                                                                                                                                | Same as always                          | 39.75 |
|                                                                                                                                                                                | Somehow easier                          | 10.37 |
|                                                                                                                                                                                | Much easier than before                 | 2.50  |

**WebTable 1:** Family status, relationships among members and financial status

### ***General somatic health***

Self-reporting of chronic medical conditions (e.g. asthma, diabetes melitus, hypertension, thyroid disorder, cardiological etc.) was positive in 17.64%.

- Excellent general health was reported by 30.45%
- Very good by 42.22%
- Good by 20.01%
- Fair by 6.39% and
- Bad by 0.90%.

|                               | <b>Stratified<br/>study sample</b> |
|-------------------------------|------------------------------------|
| <b>Condition</b>              | <b>%</b>                           |
| Any chronic somatic condition | 17.64                              |
| Asthma                        | 4.22                               |
| Hashimoto disease             | 0.61                               |
| Any thyroid disorder          | 2.79                               |
| Any autoimmune disorder       | 1.79                               |
| Any cancer                    | 0.13                               |
| Any cardiological             | 0.62                               |
| Hypertension                  | 5.70                               |
| Diabetes melitus              | 1.33                               |
| Any neurological              | 0.60                               |
| Any renal disorder            | 0.55                               |
| Any myoskeletal disorder      | 0.15                               |
| Any pulmonary disorder        | 4.61                               |

**WebTable 2:** General health status in the stratified dataset

### ***Thoughts pertaining to the COVID-19 outbreak***

- That prophylactic measures indeed work was believed by 84.14%
- More than 95% followed them at least to a moderate degree
- Almost 80% obeyed to at least a large extend to the lockdown rules
- More than 80% were feeling that the situation was very stressful
- More than 95% feels that there was enough information concerning the necessity of the measures
- Less than 10% was afraid much or very much that they will get COVID-19
- But interestingly, almost half are afraid that a family member will do.

| <b>Question</b>                                                                                                                                                                                  | <b>Answer</b>               | <b>%</b> |
|--------------------------------------------------------------------------------------------------------------------------------------------------------------------------------------------------|-----------------------------|----------|
| C1. Are you afraid that you will contract the coronavirus;                                                                                                                                       | Never                       | 17.58    |
|                                                                                                                                                                                                  | A little                    | 43.26    |
|                                                                                                                                                                                                  | Moderately                  | 29.75    |
|                                                                                                                                                                                                  | Much                        | 8.06     |
|                                                                                                                                                                                                  | Very Much                   | 1.34     |
| C3. Does the possibility that a member of your family could contract the coronavirus and die because of it makes you frightened?                                                                 | Never                       | 6.72     |
|                                                                                                                                                                                                  | A little                    | 22.55    |
|                                                                                                                                                                                                  | Moderately                  | 21.93    |
|                                                                                                                                                                                                  | Much                        | 27.90    |
|                                                                                                                                                                                                  | Very Much                   | 20.87    |
| C4. Are you afraid that in case you contract the coronavirus, some people will step away from your life and behave to you in a different way later?                                              | Never                       | 50.54    |
|                                                                                                                                                                                                  | A little                    | 23.74    |
|                                                                                                                                                                                                  | Moderately                  | 15.87    |
|                                                                                                                                                                                                  | Much                        | 6.93     |
|                                                                                                                                                                                                  | Very Much                   | 2.91     |
| D1. According to your opinion, the amount of time that you spend outside of your house for reasons not regarding your work during this period is:                                                | Minimum                     | 57.44    |
|                                                                                                                                                                                                  | Less than humanly necessary | 24.37    |
|                                                                                                                                                                                                  | Moderate/reasonable         | 16.07    |
|                                                                                                                                                                                                  | Enough                      | 1.75     |
|                                                                                                                                                                                                  | A lot                       | 0.20     |
|                                                                                                                                                                                                  | Excessive                   | 0.15     |
| D2. Are you currently locked up in the house?                                                                                                                                                    | Not at all                  | 8.40     |
|                                                                                                                                                                                                  | Partially                   | 13.48    |
|                                                                                                                                                                                                  | To a high degree            | 52.72    |
|                                                                                                                                                                                                  | Completely                  | 25.40    |
| D3. According to the instructions given by WHO, it is necessary for some precautions to be taken in order to prevent the spread of the virus. Do you believe that you take adequate precautions? | Not at all                  | 0.74     |
|                                                                                                                                                                                                  | A little bit                | 2.89     |
|                                                                                                                                                                                                  | Moderately                  | 18.62    |
|                                                                                                                                                                                                  | Much                        | 51.65    |
|                                                                                                                                                                                                  | Very Much                   | 26.07    |
| D4. Do you believe that that you have received sufficient information about the necessity of the measures taken?                                                                                 | Not at al                   | 1.94     |
|                                                                                                                                                                                                  | a little bit                | 3.26     |
|                                                                                                                                                                                                  | moderately                  | 15.59    |
|                                                                                                                                                                                                  | much                        | 48.25    |
|                                                                                                                                                                                                  | very much                   | 30.94    |

**WebTable 3:** Thoughts pertaining to the COVID-19 outbreak

### *Lifestyle changes during the lockdown.*

There were lifestyle changes concerning physical activity, exercise, appetite and eating sex and sleep and are mentioned in the appendix and are shown in WebTable 4. In approximately 22% religious or spiritual inquires increased

#### Exercise:

- Almost 90% considered exercise to be important during lockdown and
- 70% that it is useful in the management of anxiety,
- Only half had increased exercising at least moderately,
- While in half the overall physical activity has been reduced.

#### Eating:

- More than half report they have increased appetite and eat more than before, but
- Overall, the quality in terms of healthy dietary style had not changed.
- More than 40% had put some weight.

#### Internet use:

- More than half use internet and the social media more frequently but
- New habits emerged in a minority (17.28%).

#### Sleep:

- Quality of sleep worsened in more than 40%.

#### Smoking, alcohol and substance use:

- No changes in smoking habits
- Alcohol use increased
- Substance use decreased.

#### Sex

- Sexual desire did not change,
- Frequency of intercourse and satisfaction decreased and
- Are considered to be unsatisfactory by half of cases.

#### Religiousness and spirituality:

- In approximately 22% religious or spiritual inquires increased



| Question                                                                                                          | Answer                                                                                                                                                                                                                                                                                              | %                                         |
|-------------------------------------------------------------------------------------------------------------------|-----------------------------------------------------------------------------------------------------------------------------------------------------------------------------------------------------------------------------------------------------------------------------------------------------|-------------------------------------------|
| H1. Does exercise help you at the prevention of anxiety?                                                          | Not at all<br>a little<br>moderately<br>much<br>a lot                                                                                                                                                                                                                                               | 13.37<br>15.48<br>19.68<br>32.70<br>18.76 |
| H2. Do you consider that exercise is important during this pandemic?                                              | Not at all<br>a little<br>moderately<br>much<br>a lot                                                                                                                                                                                                                                               | 3.69<br>6.54<br>14.24<br>41.46<br>34.06   |
| H3. Do you have increased the frequency and intensity of your physical workout during this pandemic and lockdown? | Not at all<br>a little<br>moderately<br>much<br>a lot                                                                                                                                                                                                                                               | 30.45<br>21.13<br>29.22<br>12.45<br>6.75  |
| H4. How much has your physical activity been affected by this epidemic of COVID-19?                               | It decreased much<br>It decreased a little<br>Neither decreased, nor increased<br>It increased a little<br>It increased much                                                                                                                                                                        | 27.20<br>18.74<br>28.69<br>18.52<br>6.84  |
| I1. During the days of the lockdown did you notice the need to eat larger amounts of food or eat more often?      | I eat much less than I used to<br>I eat a bit less than I used to<br>Neither more nor less<br>I eat a bit more than I used to<br>I eat much more than I used to                                                                                                                                     | 2.28<br>9.49<br>33.24<br>42.42<br>12.56   |
| I2. Please mark the answer that best represents you during the period of the lockdown:                            | I eat in a healthier way<br>My eating habits and preferences have not changed<br>I eat in a more unhealthy way                                                                                                                                                                                      | 20.42<br>58.06<br>21.52                   |
| I3. Please mark the answer that best represents you during the period of the lockdown:                            | My body weight has significantly decreased (more than 2-3 kilos)<br>My body weight has slightly decreased (less than 2 kilos lost)<br>My body weight is stable<br>My body weight has slightly increased (less than 2 kilos put)<br>My body weight has significantly increased (more than 2-3 kilos) | 4.90<br>13.81<br>38.07<br>32.30<br>10.91  |
| K1. The information and use of the internet worry me about the issue regarding the COVID-19:                      | Not at all<br>A little<br>Moderately<br>Much<br>Very much                                                                                                                                                                                                                                           | 33.75<br>26.10<br>22.51<br>12.35<br>5.28  |
| K2. Generally, most of the internet sources regarding information about COVID-19 are misinforming/misleading:     | Not at all<br>A little<br>Moderately<br>Much<br>Very much                                                                                                                                                                                                                                           | 3.82<br>21.90<br>36.58<br>25.77<br>11.92  |

|                                                                                                                                                         |                                                                                                           |                                           |
|---------------------------------------------------------------------------------------------------------------------------------------------------------|-----------------------------------------------------------------------------------------------------------|-------------------------------------------|
| K3. Due to the conditions, the internet takes up more of my time than usual:                                                                            | Not at all<br>A little<br>Moderately<br>Much<br>Very much                                                 | 10.43<br>17.93<br>22.59<br>34.22<br>14.82 |
| K4. How much do you use the social media while in isolation at home?                                                                                    | More than before<br>The same as before<br>Less than before                                                | 69.26<br>28.56<br>2.18                    |
| K5. Have you acquired internet-related habits that you did not have before (for example: created a facebook account, engaging in cybersex or gambling)? | Yes                                                                                                       | 17.28                                     |
| L1. The quality of my sleep has changed recently. It is:                                                                                                | Much worse<br>A little bit worse<br>The same (neither worse nor better)<br>A little better<br>Much better | 10.79<br>29.17<br>44.96<br>10.85<br>4.21  |
| L2. I tend to stay up late and sleep for many hours during the day.                                                                                     | Almost never<br>Rarely<br>Sometimes<br>Often<br>Almost always                                             | 40.75<br>19.14<br>18.84<br>13.36<br>7.90  |
| L3. I take sleeping pills to help me sleep at night.                                                                                                    | Almost never<br>Rarely<br>Sometimes<br>Often<br>Almost always                                             | 94.48<br>2.46<br>1.64<br>0.88<br>0.52     |
| L4. I am having dreams in which I feel trapped, over the last 3 weeks.                                                                                  | Almost never<br>Rarely<br>Sometimes<br>Often<br>Almost always                                             | 74.16<br>16.37<br>5.79<br>2.61<br>1.06    |
| M2. Alcohol use before the epidemic:                                                                                                                    | I did not drink much<br>I drank a lot (more than one drink or its equivalent every day)                   | 92.17<br>7.83                             |
| M3. Use of illegal substances before the epidemic (e.g. hashish):                                                                                       | I did not use it<br>Occasionally and rather rarely<br>Often                                               | 92.30<br>6.37<br>1.33                     |
| M4. During lockdown, you smoke compared to before:                                                                                                      | Less than before<br>Same as before<br>More than before                                                    | 21.75<br>63.52<br>14.72                   |
| M5. During lockdown, you drink alcohol compared to before:                                                                                              | Less than before<br>Same as before<br>More than before                                                    | 31.27<br>58.42<br>10.30                   |

|                                                                                                        |                        |       |
|--------------------------------------------------------------------------------------------------------|------------------------|-------|
| M6. While isolated at home, you use illegal substances compared to before:                             | Less than before       | 24.76 |
|                                                                                                        | Same as before         | 73.88 |
|                                                                                                        | More than before       | 1.36  |
| N1. How would you characterize the frequency of your sexual intercourse?                               | Clearly inadequate     | 35.33 |
|                                                                                                        | Rather inadequate      | 13.82 |
|                                                                                                        | Neutral                | 26.19 |
|                                                                                                        | Rather satisfactory    | 15.55 |
|                                                                                                        | Clearly satisfactory   | 9.10  |
| N2. Due to the new lockdown conditions, has your desire for sexual intercourse increased or decreased? | Has decreased a lot    | 11.87 |
|                                                                                                        | Has decreased slightly | 15.65 |
|                                                                                                        | Remains the same       | 46.87 |
|                                                                                                        | Has increased slightly | 17.71 |
|                                                                                                        | Has increased a lot    | 7.89  |
| N3. How much pleasure and satisfaction do you get from your current sex life?                          | Not at all             | 35.74 |
|                                                                                                        | A little               | 13.54 |
|                                                                                                        | Moderately             | 23.41 |
|                                                                                                        | Much                   | 18.69 |
|                                                                                                        | Very much              | 8.60  |
| N4. Do you think sex helps you deal with your daily stress and anxiety?                                | Not at all             | 13.20 |
|                                                                                                        | A little               | 10.36 |
|                                                                                                        | Moderately             | 23.39 |
|                                                                                                        | Much                   | 32.77 |
|                                                                                                        | Very much              | 20.26 |
| P1. Over the last 2-3 weeks, my religious/spiritual inquiries have been increased.                     | Not at all             | 78.31 |
|                                                                                                        | A little               | 12.96 |
|                                                                                                        | Much                   | 6.23  |
|                                                                                                        | Very much              | 2.49  |

**WebTable 4:** Lifestyle changes during lockdown

***Beliefs in conspiracy theories***

The responses concerning the beliefs in conspiracy theories suggested that these beliefs are widely prevalent. The more bizarre of them, like the relationship between COVID-19 and 5G, or the involvement of a supernatural power enjoy lower acceptance, but still percentages are significant. On average at least half of cases accepted at least to a moderate degree some non-bizzare conspiracy including the deliberate release of the virus as a bio-weapon to deliberately create a global crisis.

| Question                                                                                                                                                        | Answer                    | %     |
|-----------------------------------------------------------------------------------------------------------------------------------------------------------------|---------------------------|-------|
| J1. Do you believe that the COVID-19 vaccine was ready even before the virus broke out and they conceal it from us for the benefit of pharmaceutical companies? | I don't believe it at all | 44.11 |
|                                                                                                                                                                 | A little bit              | 9.70  |
|                                                                                                                                                                 | Maybe                     | 32.75 |
|                                                                                                                                                                 | Much                      | 5.36  |
|                                                                                                                                                                 | Very much                 | 8.07  |

|                                                                                                                                                                |                                                                         |                                           |
|----------------------------------------------------------------------------------------------------------------------------------------------------------------|-------------------------------------------------------------------------|-------------------------------------------|
| J2. Do you believe that COVID-19 was created in a laboratory to be used as a biochemical weapon for the extermination of the human population?                 | I don't believe it at all<br>A little bit<br>Maybe<br>Much<br>Very much | 34.09<br>13.30<br>31.89<br>10.28<br>10.43 |
| J3. Do you believe that COVID-19 is the result of 5G technology antenna?                                                                                       | I don't believe it at all<br>A little bit<br>Maybe<br>Much<br>Very much | 72.05<br>7.58<br>16.47<br>1.87<br>2.02    |
| J4. Do you believe that COVID-19 appeared accidentally from human contact with animals and it was something that generally happens and was generally expected? | I don't believe it at all<br>A little bit<br>Maybe<br>Much<br>Very much | 18.93<br>13.39<br>38.86<br>18.93<br>9.88  |
| J5. Do you believe that covid-19 has much lower mortality rate but there is misinformation and terror-inducing propaganda?                                     | I don't believe it at all<br>A little bit<br>Maybe<br>Much<br>Very much | 30.30<br>19.32<br>26.71<br>14.32<br>9.35  |
| J6. Do you believe that COVID-19 is a creation of the world's powerful leaders to create a global economic crisis?                                             | I don't believe it at all<br>A little bit<br>Maybe<br>Much<br>Very much | 36.36<br>14.83<br>28.76<br>10.56<br>9.47  |
| J7. Do you believe that CONID-19 is a sign of divine power to destroy our planet?                                                                              | I don't believe it at all<br>A little bit<br>Maybe<br>Much<br>Very much | 79.74<br>7.44<br>9.55<br>1.51<br>1.75     |

**WebTable 5:** Beliefs in conspiracy theories pertaining to the COVID-19 outbreak

## ***b. Case-control analysis***

This analysis was performed with the use of the original dataset, before the stratification

### ***The effect of lockdown on Mental health***

#### Previous history of depression (B5)

- With vs. without in terms of development of depression or distress  
Chi-square=201.816, df=2,  $p<0.001$ . Bonferroni corrected Post-hoc tests suggested the two groups differed both in the presence of distress as well as for depression ( $p<0.001$ )  
23.31% of those with previous history manifested depression for one more time and 8.96% of cases without previous history, manifested their first depressive episode.
- With vs. without in terms of the changes in suicidal thoughts (O11)  
Chi-square=44.601, df=16,  $p<0.001$ . Bonferroni corrected Post-hoc tests suggested that the two groups differed in any increase in suicidal ideation (8.39% vs. 15.66%,  $p<0.001$ ).

#### Previous history of suicidal attempts (O13)

- With vs. without in terms of the development of depression or distress  
Chi-square=134.791, df=2,  $p<0.001$ . Bonferroni corrected post-hoc tests suggested that the two groups differed both in the presence of distress as well as for depression ( $p<0.001$ ).
- With vs. without in terms of changes in current suicidal ideation (O11)  
Chi-square=61.561, df=16,  $p<0.001$ . Bonferroni corrected post-hoc tests suggested that the two groups differed in any increase in suicidal ideation (9.96% vs. 23.19%,  $p<0.001$ ).

|                                                                                                                                  | <b>B5. History of depression</b> |          |                       |          | <b>O13. History of suicidal attempts</b>     |          |                      |          |
|----------------------------------------------------------------------------------------------------------------------------------|----------------------------------|----------|-----------------------|----------|----------------------------------------------|----------|----------------------|----------|
|                                                                                                                                  | <b>No<br/>N=2288</b>             |          | <b>Yes<br/>N=1111</b> |          | <b>No<br/>N=3192</b>                         |          | <b>Yes<br/>N=207</b> |          |
|                                                                                                                                  | <b>N</b>                         | <b>%</b> | <b>N</b>              | <b>%</b> | <b>N</b>                                     | <b>%</b> | <b>N</b>             | <b>%</b> |
| <b>Presence of depression or distress (CES-D)</b>                                                                                |                                  |          |                       |          |                                              |          |                      |          |
| Normal (no distress or depression)                                                                                               | 1884                             | 82.34    | 669                   | 60.22    | 2461                                         | 77.10    | 92                   | 44.44    |
| Distress                                                                                                                         | 199                              | 8.70     | 183                   | 16.47    | 347                                          | 10.87    | 35                   | 16.91    |
| Depression                                                                                                                       | 205                              | 8.96     | 259                   | 23.31    | 384                                          | 12.03    | 80                   | 38.65    |
|                                                                                                                                  |                                  |          |                       |          | <i>Chi-square=201.816, df=2, p&lt;0.001</i>  |          |                      |          |
|                                                                                                                                  |                                  |          |                       |          | <i>Chi-square=134.791, df=2, p&lt;0.001.</i> |          |                      |          |
| <b>B5. History of depression</b>                                                                                                 |                                  |          |                       |          |                                              |          |                      |          |
| Yes                                                                                                                              |                                  |          |                       |          | 975                                          | 30.55    | 136                  | 65.70    |
| No                                                                                                                               |                                  |          |                       |          | 2217                                         | 69.45    | 71                   | 34.30    |
|                                                                                                                                  |                                  |          |                       |          | <i>Chi-square=109.194, df=1, p&lt;0.001</i>  |          |                      |          |
| <b>O11. How much has your tendency to think about death and/or suicide changed, compared to before the outbreak of COVID-19?</b> |                                  |          |                       |          |                                              |          |                      |          |
| Very much decreased                                                                                                              | 98                               | 4.28     | 47                    | 4.23     | 139                                          | 4.35     | 6                    | 2.90     |
| Decreased a bit                                                                                                                  | 23                               | 1.01     | 17                    | 1.53     | 34                                           | 1.07     | 6                    | 2.90     |
| Neither increased nor decreased                                                                                                  | 1975                             | 86.32    | 873                   | 78.58    | 2701                                         | 84.62    | 147                  | 71.01    |
| Increased a bit                                                                                                                  | 167                              | 7.30     | 146                   | 13.14    | 279                                          | 8.74     | 34                   | 16.43    |
| Very much increased                                                                                                              | 25                               | 1.09     | 28                    | 2.52     | 39                                           | 1.22     | 14                   | 6.76     |
|                                                                                                                                  |                                  |          |                       |          | <i>Chi-square=44.601, df=16, p&lt;0.001</i>  |          |                      |          |
|                                                                                                                                  |                                  |          |                       |          | <i>Chi-square=61.561, df=16, p&lt;0.001</i>  |          |                      |          |

**Webtable 6:** The comparison of cases without vs. those with a previous history of depression (B5) in terms of development of depression or distress and in terms of the changes in suicidal thoughts

Multiple forward stepwise linear regression analysis was performed with

- Dependent variables: change in anxiety (F21), change in depressive affect (G21), change in suicidal thoughts (O11) and the development of distress or depression,
- Predictors: sex (A1), age (A2), education level (A7), number of persons in household (A5), continue to work during lockdown (A11), condition of general health (B1), presence of a chronic medical condition (B2), being a carer of a person belonging to a vulnerable group (B4), any mental history (B5), history of depression (B5), fears of getting COVID-19 (C1), fears that a member of the family will get COVID-19 and die (C3), time spent outside of house during lockdown (D1), satisfaction by availability of information (D4), conflicts within family (E3), change in quality of relationships within family (E4), keeping a basic routine during lockdown (E5), change in economic situation (E7), history of suicidality (O13) and self-harm (O12) and changes in religiousness/spirituality (P1).

The results with the variables which survived in the model are shown in table 3 of the manuscript. They suggest the following:

For change in anxiety (F21) the significantly contributing variables were:

- B1. General condition of health (positive sign of Beta coefficient)
- C1. Afraid he/she will get the covid and die (negative sign of Beta coefficient)
- C3. Afraid that family member will got covid and die (negative sign of Beta coefficient)
- D1. Time spend outside home, work not included (positive sign of Beta coefficient)
- E3. Conflicts with other family members (negative sign of Beta coefficient)
- E4. Overall quality of relationships within family (positive sign of Beta coefficient)
- E5. Keeping a basic daily routine (positive sign of Beta coefficient)
- E7. Change in economic situation (positive sign of Beta coefficient)
- O12. History of deliberate self-harm (negative sign of Beta coefficient)

The model explains 16.8% of anxiety

For change in depressive emotions (G21) the significantly contributing variables were:

- B1. General condition of health (positive sign of Beta coefficient)
- C1. Afraid he/she will get the covid and die (negative sign of Beta coefficient)
- D1. Time spend outside home, work not included (positive sign of Beta coefficient)
- E3. Conflicts with other family members (negative sign of Beta coefficient)
- E4. Overall quality of relationships within family (positive sign of Beta coefficient)
- E5. Keeping a basic daily routine (positive sign of Beta coefficient)
- E7. Change in economic situation (positive sign of Beta coefficient)
- O12. History of deliberate self-harm (negative sign of Beta coefficient)

The model explains 15.9% of depressive thoughts

For the development of depression or distress (on the basis of cut-off and algorithm and CES-D scores) the significantly contributing variables were:

- A2 age (negative sign of Beta coefficient)
- B1. General condition of health (negative sign of Beta coefficient)
- C1. Afraid he/she will get the covid and die (negative sign of Beta coefficient)
- C3. Afraid that family member will got covid and die (positive sign of Beta coefficient)

- E3. Conflicts with other family members (positive sign of Beta coefficient)
- E4. Overall quality of relationships within family (negative sign of Beta coefficient)
- E5. Keeping a basic daily routine (negative sign of Beta coefficient)
- E7. Change in economic situation (negative sign of Beta coefficient)
- O12. History of deliberate self-harm (positive sign of Beta coefficient)
- O13. History of suicide attempt (positive sign of Beta coefficient)

The model explains 21.6% of depression or distress

For change in thoughts of suicide (O11) the significantly contributing variables were:

- B1. General condition of health (negative sign of Beta coefficient)
- C1. Afraid he/she will get the covid and die (positive sign of Beta coefficient)
- E3. Conflicts with other family members (positive sign of Beta coefficient)
- O13. History of suicide attempt (positive sign of Beta coefficient)
- P1. Change in religiousness/spirituality (negative sign of Beta coefficient)

The model explains 3.1% of changes in suicidality

As the above show, the changes in anxiety, depressive thoughts, the development of distress or clinical depression and changes in suicidality are determined by overlapping groups of variables, and a model might take shape.

One important detail is that the signs of beta coefficients of variables concerning family dynamics suggests that fewer conflicts and better quality of relationships are surprisingly related to higher anxiety and depressive emotions, higher rates of depression and distress and higher rates of suicidal thoughts. This might mean that stronger ties to family members and the responsibility that comes with it or on the contrary the expected support and fears of loss of it, constitute a risk rather than a protective factor, and this might constitute a strong cultural element in the model.

If we consider a more or less linear continuum from fear to anxiety to depressive emotions to clinical depression and eventually to suicidality, the model which can be derived suggests there is a core of variables (General condition of health, fears that he/she will get the COVID-19 and conflicts with other family members) exerting a generic stressful effect, leading to simple thoughts and feelings of fear.

At a second step, the development of anxiety is determined by a number of social and interpersonal variables including the quality of relationships within family, keeping a basic daily routine, change in economic situation and history of deliberate self-harm and being afraid that a family member will get COVID-19 and die. Interestingly, all of these variables are social-interpersonal (including history of self-harm) and suggest that the fear of losing the supportive environment is stronger than the support by the environment in those persons who go on to develop anxiety. At the next step, the restriction of time outside the house because of the lockdown leads to the development of depressive emotions, while the additional presence of history of suicidal attempt especially in younger individuals constitute additional risk factors to develop clinical depression.

Eventually, spiritual and religious affiliation could protect from emerging suicidal thoughts (Webfigure A). These results are in accord with the reports in the literature<sup>10-14</sup> although it is the first time that a comprehensive model is proposed.



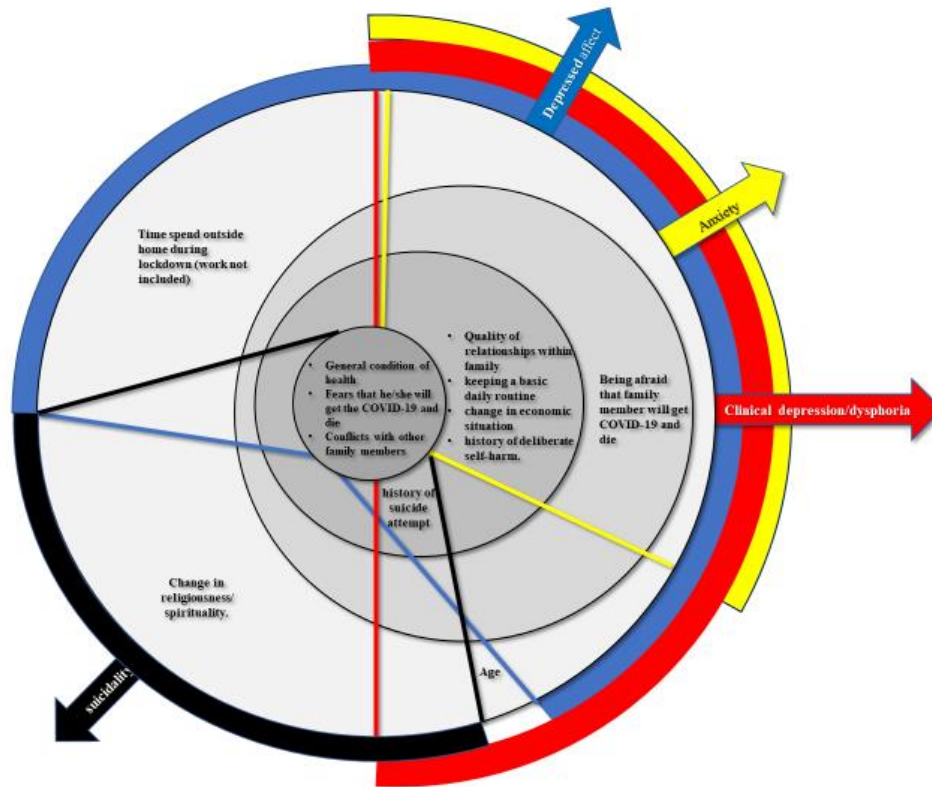

**WebFigure A:** Risk and protective factors in overlapping clusters with a common core at the center, give rise to anxiety (yellow range) distress (depressive affect; blue range), clinical depression (red range) and suicidality (black range).

### *Type of work and mental health*

Factorial ANOVA with:

Grouping variables:

- Sex
- Type of work (private, civil , unemployed or other)

Dependent variables:

- STAI
- CES-D
- RASS subscale scores
- change in these three scores as an effect of the lockdown (F21, G21, O11)

Returned significant effects for

- Sex (Wilks=0.980, F=4.139, df=16, error df=6760,  $p<0.0001$ )
- Type of work (Wilks=0.978, F=3.085, df=24, error df=9803.63,  $p<0.0001$ )
- As well as for their interaction (Wilks=0.977, F=1.593, df=48, error df=16635.08,  $p=0.005$ ).

The Scheffe post-hoc tests (at  $p<0.05$ ) revealed that unemployed females differed from males working in private, civil servants and 'other' in terms of STAI ( $51.07\pm 12.84$  vs.  $45.28\pm 13.10$  vs.  $41.65\pm 13.28$ ,  $44.25\pm 12.11$ ), and unemployed and 'other' females from males working in private and civil servants in terms of CES-D ( $19.58\pm 7.74$  and  $19.47\pm 8.19$ , vs.  $16.00\pm 7.07$  vs.  $14.97\pm 6.06$ ). There was no effect on change because of lockdown.

***Mental health and conspiracy theories***

Chi-square tests revealed no relationship between history of depression (B5), self-harm (O12) or suicidal attempts (O13) and any conspiracy beliefs (J1-J7) concerning COVID-19.

|                                                                                                                                                            | <b>History of depression</b>    |              |       |      |           | <b>History of self-harm</b>      |              |       |      |           | <b>History of suicidal attempt</b> |              |       |      |           |
|------------------------------------------------------------------------------------------------------------------------------------------------------------|---------------------------------|--------------|-------|------|-----------|----------------------------------|--------------|-------|------|-----------|------------------------------------|--------------|-------|------|-----------|
| Do you believe that the COVID-19 vaccine was ready even before the virus broke out and they conceal it from us for the benefit of pharmaceutical companies |                                 |              |       |      |           |                                  |              |       |      |           |                                    |              |       |      |           |
|                                                                                                                                                            | no                              | a little bit | maybe | much | Very much | no                               | a little bit | maybe | much | Very much | no                                 | a little bit | maybe | much | Very much |
| No                                                                                                                                                         | 975                             | 247          | 736   | 156  | 174       | 1223                             | 282          | 904   | 199  | 218       | 1385                               | 325          | 1020  | 221  | 241       |
| Yes                                                                                                                                                        | 498                             | 103          | 342   | 81   | 87        | 250                              | 68           | 174   | 38   | 43        | 88                                 | 25           | 58    | 16   | 20        |
|                                                                                                                                                            | Chi-square=3.273, df=4, p=0.513 |              |       |      |           | Chi-square=2.201, df=4, p=0.698  |              |       |      |           | Chi-square=2.972, df=4, p=0.562    |              |       |      |           |
| Do you believe that COVID-19 was created in a laboratory to be used as a biochemical weapon for the extermination of the human population?                 |                                 |              |       |      |           |                                  |              |       |      |           |                                    |              |       |      |           |
| No                                                                                                                                                         | 759                             | 343          | 685   | 270  | 231       | 943                              | 412          | 854   | 327  | 290       | 1086                               | 461          | 951   | 369  | 325       |
| Yes                                                                                                                                                        | 395                             | 150          | 318   | 125  | 123       | 211                              | 81           | 149   | 68   | 64        | 68                                 | 32           | 52    | 26   | 29        |
|                                                                                                                                                            | Chi-square=3.709, df=4, p=0.446 |              |       |      |           | Chi-square=5,022, df=4, p=0.285  |              |       |      |           | Chi-square=4,558, df=4, p=0.335    |              |       |      |           |
| Do you believe that COVID-19 is the result of 5G technology antenna?                                                                                       |                                 |              |       |      |           |                                  |              |       |      |           |                                    |              |       |      |           |
| No                                                                                                                                                         | 1649                            | 171          | 373   | 54   | 41        | 2038                             | 211          | 467   | 61   | 49        | 2319                               | 235          | 512   | 72   | 54        |
| Yes                                                                                                                                                        | 821                             | 78           | 167   | 26   | 19        | 432                              | 38           | 73    | 19   | 11        | 151                                | 14           | 28    | 8    | 6         |
|                                                                                                                                                            | Chi-square=1,343, df=4, p=0.854 |              |       |      |           | Chi-square=8,258, df=4, p=0.082  |              |       |      |           | Chi-square=4,613, df=4, p=0.329    |              |       |      |           |
| Do you believe that COVID-19 appeared accidentally from human contact with animals and it was something that generally happens and was generally expected? |                                 |              |       |      |           |                                  |              |       |      |           |                                    |              |       |      |           |
| No                                                                                                                                                         | 479                             | 344          | 826   | 448  | 191       | 589                              | 412          | 1041  | 547  | 237       | 652                                | 454          | 1178  | 632  | 276       |
| Yes                                                                                                                                                        | 225                             | 141          | 415   | 224  | 106       | 115                              | 73           | 200   | 125  | 60        | 52                                 | 31           | 63    | 40   | 21        |
|                                                                                                                                                            | Chi-square=3.273, df=4, p=0.513 |              |       |      |           | Chi-square=2.201, df=4, p=0.698  |              |       |      |           | Chi-square=2.972, df=4, p=0.562    |              |       |      |           |
| Do you believe that covid-19 has much lower mortality rate but there is misinformation and terror-inducing propaganda?                                     |                                 |              |       |      |           |                                  |              |       |      |           |                                    |              |       |      |           |
| No                                                                                                                                                         | 646                             | 459          | 596   | 353  | 234       | 849                              | 524          | 757   | 434  | 262       | 936                                | 603          | 844   | 499  | 310       |
| Yes                                                                                                                                                        | 342                             | 191          | 303   | 179  | 96        | 139                              | 126          | 142   | 98   | 68        | 52                                 | 47           | 55    | 33   | 20        |
|                                                                                                                                                            | Chi-square=4,715, df=4, p=0.317 |              |       |      |           | Chi-square=13,404, df=4, p=0.009 |              |       |      |           | Chi-square=2,674, df=4, p=0.613    |              |       |      |           |
| Do you believe that COVID-19 is a creation of the world's powerful leaders to create a global economic crisis?                                             |                                 |              |       |      |           |                                  |              |       |      |           |                                    |              |       |      |           |
| No                                                                                                                                                         | 800                             | 316          | 686   | 281  | 205       | 995                              | 391          | 849   | 321  | 270       | 1143                               | 450          | 926   | 375  | 298       |
| Yes                                                                                                                                                        | 414                             | 155          | 305   | 122  | 115       | 319                              | 110          | 209   | 115  | 78        | 71                                 | 21           | 65    | 28   | 22        |
|                                                                                                                                                            | Chi-square=5,363, df=4, p=0.252 |              |       |      |           | Chi-square=10,618, df=4, p=0.031 |              |       |      |           | Chi-square=3,560, df=4, p=0.468    |              |       |      |           |

| Do you believe that CONID-19 is a sign of divine power to destroy our planet? |      |     |     |    |                                 |      |     |     |    |                                 |      |     |     |    |    |
|-------------------------------------------------------------------------------|------|-----|-----|----|---------------------------------|------|-----|-----|----|---------------------------------|------|-----|-----|----|----|
| No                                                                            | 1809 | 181 | 232 | 39 | 27                              | 2228 | 228 | 289 | 44 | 37                              | 2534 | 260 | 314 | 48 | 36 |
| Yes                                                                           | 879  | 97  | 105 | 14 | 16                              | 460  | 50  | 48  | 9  | 6                               | 154  | 18  | 23  | 5  | 7  |
| Chi-square=2,320, df=4, p=0.677                                               |      |     |     |    | Chi-square=2,280, df=4, p=0.684 |      |     |     |    | Chi-square=9,844, df=4, p=0.043 |      |     |     |    |    |

**WebTable 7:** Chi-square tests revealed no relationship between history of depression (B5), self-harm (O12) or suicidal attempts (O13) and any conspiracy beliefs (J1-J7) concerning COVID-19.

The use of Factorial ANOVA with each history variable as grouping and the belief variables as dependent did not return significant results either.

Chi-square tests revealed a significant relationship between the current presence of distress or depression and the belief the vaccine was ready before the outbreak (J1;  $p=0.003$ ), that there is a relationship to 5G (J3;  $p<0.001$ ), with all three groups differing from each other.

|                                                                                                                                                                                                                                                                     | no   |       | a little bit |       | maybe |       | much |       | Very much |       |
|---------------------------------------------------------------------------------------------------------------------------------------------------------------------------------------------------------------------------------------------------------------------|------|-------|--------------|-------|-------|-------|------|-------|-----------|-------|
|                                                                                                                                                                                                                                                                     | N    | %     | N            | %     | N     | %     | N    | %     | N         | %     |
| J1. Do you believe that the COVID-19 vaccine was ready even before the virus broke out and they conceal it from us for the benefit of pharmaceutical companies?<br>Chi-square=23,088, df=8, p=0.0033. Post-hoc reveals that all three groups differ from each other |      |       |              |       |       |       |      |       |           |       |
| Healthy                                                                                                                                                                                                                                                             | 1141 | 44.69 | 261          | 10.22 | 800   | 31.34 | 179  | 7.01  | 172       | 6.74  |
| Distress                                                                                                                                                                                                                                                            | 151  | 39.53 | 46           | 12.04 | 128   | 33.51 | 18   | 4.71  | 39        | 10.21 |
| Depression                                                                                                                                                                                                                                                          | 181  | 39.01 | 43           | 9.27  | 150   | 32.33 | 40   | 8.62  | 50        | 10.78 |
| J2. Do you believe that COVID-19 was created in a laboratory to be used as a biochemical weapon for the extermination of the human population?<br>Chi-square=11,630, df=8, p=0.168                                                                                  |      |       |              |       |       |       |      |       |           |       |
| Healthy                                                                                                                                                                                                                                                             | 877  | 34.35 | 372          | 14.57 | 769   | 30.12 | 292  | 11.44 | 243       | 9.52  |
| Distress                                                                                                                                                                                                                                                            | 125  | 32.72 | 58           | 15.18 | 109   | 28.53 | 42   | 10.99 | 48        | 12.57 |
| Depression                                                                                                                                                                                                                                                          | 152  | 32.76 | 63           | 13.58 | 125   | 26.94 | 61   | 13.15 | 63        | 13.58 |
| J3. Do you believe that COVID-19 is the result of 5G technology antenna?<br>Chi-square=26,426, df=8, p=0.0009 Post-hoc reveals that all three groups differ from each other                                                                                         |      |       |              |       |       |       |      |       |           |       |
| Healthy                                                                                                                                                                                                                                                             | 1876 | 73.48 | 183          | 7.17  | 405   | 15.86 | 51   | 2.00  | 38        | 1.49  |

|                                                                                                                                                                                                                                        |      |       |     |       |     |       |     |       |     |       |
|----------------------------------------------------------------------------------------------------------------------------------------------------------------------------------------------------------------------------------------|------|-------|-----|-------|-----|-------|-----|-------|-----|-------|
| Distress                                                                                                                                                                                                                               | 268  | 70.16 | 34  | 8.90  | 67  | 17.54 | 9   | 2.36  | 4   | 1.05  |
| Depression                                                                                                                                                                                                                             | 326  | 70.26 | 32  | 6.90  | 68  | 14.66 | 20  | 4.31  | 18  | 3.88  |
| J4. Do you believe that COVID-19 appeared accidentally from human contact with animals and it was something that generally happens and was generally expected?<br>Chi-square=8,867, df=8, p=0.3536                                     |      |       |     |       |     |       |     |       |     |       |
| Healthy                                                                                                                                                                                                                                | 532  | 20.84 | 370 | 14.49 | 930 | 36.43 | 506 | 19.82 | 215 | 8.42  |
| Distress                                                                                                                                                                                                                               | 68   | 17.80 | 54  | 14.14 | 155 | 40.58 | 66  | 17.28 | 39  | 10.21 |
| Depression                                                                                                                                                                                                                             | 104  | 22.41 | 61  | 13.15 | 156 | 33.62 | 100 | 21.55 | 43  | 9.27  |
| J5. Do you believe that covid-19 has much lower mortality rate but there is misinformation and terror-inducing propaganda?<br>Chi-square=19,552, df=8, p=0.0122 Post hoc reveals that healthy cases differed from the other two groups |      |       |     |       |     |       |     |       |     |       |
| Healthy                                                                                                                                                                                                                                | 770  | 30.16 | 487 | 19.08 | 665 | 26.05 | 404 | 15.82 | 227 | 8.89  |
| Distress                                                                                                                                                                                                                               | 103  | 26.96 | 71  | 18.59 | 116 | 30.37 | 45  | 11.78 | 47  | 12.30 |
| Depression                                                                                                                                                                                                                             | 115  | 24.78 | 92  | 19.83 | 118 | 25.43 | 83  | 17.89 | 56  | 12.07 |
| J6. Do you believe that COVID-19 is a creation of the world's powerful leaders to create a global economic crisis?<br>Chi-square=18,867, df=8, p=0.0156 Post hoc reveals that healthy cases differed from the other two groups         |      |       |     |       |     |       |     |       |     |       |
| Healthy                                                                                                                                                                                                                                | 919  | 36.00 | 352 | 13.79 | 774 | 30.32 | 282 | 11.05 | 226 | 8.85  |
| Distress                                                                                                                                                                                                                               | 137  | 35.86 | 52  | 13.61 | 95  | 24.87 | 62  | 16.23 | 36  | 9.42  |
| Depression                                                                                                                                                                                                                             | 158  | 34.05 | 67  | 14.44 | 122 | 26.29 | 59  | 12.72 | 58  | 12.50 |
| J7. Do you believe that COVID-19 is a creation of the world's powerful leaders to create a global economic crisis?<br>Chi-square=14,302, df=8, p=0.0742                                                                                |      |       |     |       |     |       |     |       |     |       |
| Healthy                                                                                                                                                                                                                                | 2042 | 79.98 | 206 | 8.07  | 237 | 9.28  | 39  | 1.53  | 29  | 1.14  |
| Distress                                                                                                                                                                                                                               | 298  | 78.01 | 28  | 7.33  | 49  | 12.83 | 3   | 0.79  | 4   | 1.05  |
| Depression                                                                                                                                                                                                                             | 348  | 75.00 | 44  | 9.48  | 51  | 10.99 | 11  | 2.37  | 10  | 2.16  |

**WebTable 8:** Chi-square tests revealed a significant relationship between the current presence of distress or depression and the belief the vaccine was ready before the outbreak (J1;  $p=0.003$ ), that there is a relationship to 5G (J3;  $p<0.001$ ), with all three groups differing from each other.

### ***Mental health and somatic disorders during lockdown***

Factorial ANOVAs were performed with the use as  
Independent variables the scores on CES-D, STAI and RASS  
Grouping variables were chronic medical conditions (B2)

The results were:

- Any chronic medical condition: wilks=0.988, F=8.131, effect df=5, error df=3393, p<0.001
- Asthma: wilks=0.993, F=4.357, effect df=5, error df=3393, p<0.001
- Any pulmonary: wilks=0.993, F=4.753, effect df=5, error df=3393, p=0.004
- Any autoimmune: wilks=0.995, F=3.361, effect df=5, error df=3393, p=<0.001
- Diabetes melitus: wilks=0.995, F=3.126, effect df=5, error df=3393, p=0.008
- Hashimoto: not significant results
- Any thyroid disorder: not significant results
- Any cancer: not significant results
- Cardiological disorder: not significant results
- Neurological disorder: not significant results
- Renal disorder: not significant results
- Myoskeletal disorder: not significant results

The Scheffe post hoc tests revealed that those with the condition had higher scores in all psychometric scales.

### ***Conspiracy theories and adherence to measures***

Multiple Regression Analysis with  
Dependent variables:

- Adherence to measures, that is time spent outside home (work not included) during lockdown (D1)
- Adhering to lockdown in principle (D2)
- Keeping sufficient prophylactic measures (D3)
- The feeling that there is sufficient information concerning measures (D4)

Regressors:

- Conspiracy theories (J1-J7)

Suggested that only beliefs on the origin of virus (J1) and beliefs concerning its lethality (J5) were significantly contributing to the model. (WebTable9).

The model explained:

- 1.7% of time spent outside home (work not included) during lockdown
- 1.8% of adhering to lockdown in principle
- 4.1% of keeping sufficient prophylactic measures and
- 5.4% of the feeling that there is sufficient information concerning measures

| <b>Test: Wilks, df effect=4, df error=3388</b>                                                                                                                 |              |          |          | <b>D1. According to your opinion, the amount of time that you spend outside of your house for reasons not regarding your work during this period<br/>R<sup>2</sup>=0.017</b> |           | <b>D2. Are you currently locked up in the house?<br/>R<sup>2</sup>=0.018</b> |           | <b>D3. According to the instructions given by WHO, it is necessary for some precautions to be taken in order to prevent the spread of the virus. Do you believe that you take adequate precautions? R<sup>2</sup>=0.041</b> |           | <b>D4. Do you believe that that you have received sufficient information about the necessity of the measures taken? R<sup>2</sup>=0.054</b> |           |
|----------------------------------------------------------------------------------------------------------------------------------------------------------------|--------------|----------|----------|------------------------------------------------------------------------------------------------------------------------------------------------------------------------------|-----------|------------------------------------------------------------------------------|-----------|-----------------------------------------------------------------------------------------------------------------------------------------------------------------------------------------------------------------------------|-----------|---------------------------------------------------------------------------------------------------------------------------------------------|-----------|
|                                                                                                                                                                | <b>Value</b> | <b>F</b> | <b>p</b> | <b>Beta</b>                                                                                                                                                                  | <b>SE</b> | <b>Beta</b>                                                                  | <b>SE</b> | <b>Beta</b>                                                                                                                                                                                                                 | <b>SE</b> | <b>Beta</b>                                                                                                                                 | <b>SE</b> |
| Intercept                                                                                                                                                      | 0.223        | 2952.515 | <0.001   |                                                                                                                                                                              |           |                                                                              |           |                                                                                                                                                                                                                             |           |                                                                                                                                             |           |
| J4. Do you believe that COVID-19 appeared accidentally from human contact with animals and it was something that generally happens and was generally expected? | 0.997        | 2.555    | 0.0370   | -0.010                                                                                                                                                                       | 0.021     | 0.018                                                                        | 0.021     | <u>0.056</u>                                                                                                                                                                                                                | 0.020     | <u>0.045</u>                                                                                                                                | 0.020     |
| J5. Do you believe that covid-19 has much lower mortality rate but there is misinformation and terror-inducing propaganda?                                     | 0.954        | 41.183   | <0.001   | <u>0.117</u>                                                                                                                                                                 | 0.020     | <u>-0.079</u>                                                                | 0.020     | <u>-0.177</u>                                                                                                                                                                                                               | 0.020     | <u>-0.195</u>                                                                                                                               | 0.019     |

**WebTable 9:** Results of Multiple linear Regression analysis (total model).

## References

1. Fountoulakis KN, Papadopoulou M, Kleanthous S, et al. Reliability and psychometric properties of the Greek translation of the State-Trait Anxiety Inventory form Y: preliminary data. *Ann Gen Psychiatry*. 2006;5:2.
2. Fountoulakis K, Iacovides A, Kleanthous S, et al. Reliability, validity and psychometric properties of the Greek translation of the Center for Epidemiological Studies-Depression (CES-D) Scale. *BMC Psychiatry*. 2001;1:3.
3. Fountoulakis KN, Pantoula E, Siamouli M, et al. Development of the Risk Assessment Suicidality Scale (RASS): a population-based study. *J Affect Disord*. 2012;138(3):449-457.
4. Sarndal CE. Methods for Estimating the Precision of Survey Estimates when Imputation Has Been Used. *Survey Methodology*. 1992(18):241-252.
5. Holt D, Smith TMF. Post Stratification. *Journal of the Royal Statistical Society Series A (General)*. 1979;142(1):33-46.
6. Little RJA. Post-Stratification: A Modeler's Perspective. *Journal of the American Statistical Association*. 1993;88(423):1001-1012.
7. Lavrakas P, ed *Encyclopedia of Survey Research Methods*. Thousand Oaks, California: Sage; 2008.
8. Keeble C, Law G, Barber S, Baxter P. Choosing a Method to Reduce Selection Bias: A Tool for Researchers. *Open Journal of Epidemiology*. 2015;5:155-162.
9. MacDonald PL, Gardner RC. Type I Error Rate Comparisons of Post Hoc Procedures for I j Chi-Square Tables. *Educational and Psychological Measurement*. 2016;60(5):735-754.
10. Li J, Yang Z, Qiu H, et al. Anxiety and depression among general population in China at the peak of the COVID-19 epidemic. *World Psychiatry*. 2020;19(2):249-250.
11. Wang C, Pan R, Wan X, et al. Immediate Psychological Responses and Associated Factors during the Initial Stage of the 2019 Coronavirus Disease (COVID-19) Epidemic among the General Population in China. *Int J Environ Res Public Health*. 2020;17(5).
12. Ozdin S, Bayrak Ozdin S. Levels and predictors of anxiety, depression and health anxiety during COVID-19 pandemic in Turkish society: The importance of gender. *Int J Soc Psychiatry*. 2020:20764020927051.
13. Huang Y, Zhao N. Chinese mental health burden during the COVID-19 pandemic. *Asian J Psychiatr*. 2020;51:102052.
14. Huang Y, Zhao N. Mental health burden for the public affected by the COVID-19 outbreak in China: Who will be the high-risk group? *Psychol Health Med*. 2020:1-12.
